# Supplementary material for: ER Alpha Rapid Signaling Is Required for Estrogen Induced Proliferation and Migration of Vascular Endothelial Cells
Source: PubMed Central journal article supplement (PMC4818104; doi:10.1371/journal.pone.0152807), 2016-04-01

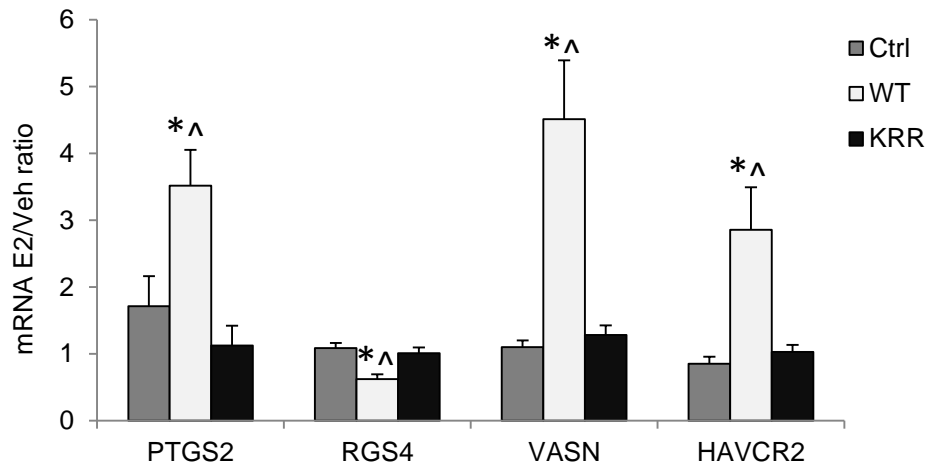

Supplement: pone.0152807.s001.pdf [file pone.0152807.s001.pdf]
